# Supplementary material for: Improving and Streamlining Gene Editing in Yarrowia lipolytica via Integration of Engineered Cas9 Protein
Source: MDPI journal article supplement (doi:10.3390/jof10010063), 2024-01-12
Supplement: s1 [file s1]

Table S1. Codon-optimized sequence of *eSpCas9* gene

| Gene                              | Sequence(5'-3')                                                                                                                                                                                                                                                                                                                                                                                                                                                                                                                                                                                                                                                                                                                                                                                                                                                                                                                                                                                                                                                                                                                                                                                                                                                                                                                                                                                                                                                                                                                                                                                                                                                                                                                                                                                                                                                                                                                                                                                                                                                                                                                                                                                                                       |
|-----------------------------------|---------------------------------------------------------------------------------------------------------------------------------------------------------------------------------------------------------------------------------------------------------------------------------------------------------------------------------------------------------------------------------------------------------------------------------------------------------------------------------------------------------------------------------------------------------------------------------------------------------------------------------------------------------------------------------------------------------------------------------------------------------------------------------------------------------------------------------------------------------------------------------------------------------------------------------------------------------------------------------------------------------------------------------------------------------------------------------------------------------------------------------------------------------------------------------------------------------------------------------------------------------------------------------------------------------------------------------------------------------------------------------------------------------------------------------------------------------------------------------------------------------------------------------------------------------------------------------------------------------------------------------------------------------------------------------------------------------------------------------------------------------------------------------------------------------------------------------------------------------------------------------------------------------------------------------------------------------------------------------------------------------------------------------------------------------------------------------------------------------------------------------------------------------------------------------------------------------------------------------------|
| Codon-optimized<br><i>eSpCas9</i> | GACAAGAAGTACTCAATCGGCCTGGACATTGGCACCAACTCTGTTGGTT<br>GGGCCGTGATTACCGACGAATACAAAGTGCCCTCTAAAAAGTTCAAGG<br>TCCTTGGAACACAGATCGACATTCGATCAAGAAGAACCTGATAGGAG<br>CACTGCTCTTCGACTCGGGTGAGACTGCGGAGGCCACCCGGCTGAAAC<br>GAACCGCCCGACGACGTTACACTCGCAGAAAGAACAGAATTTGTTACT<br>TGCAGGAAATCTTCTCGAACGAGATGGCCAAGGTGGACGACTCGTTCT<br>TCCACCGACTTGAGGAGTCCTTCCTGGTTGAGGAGGACAAGAAACACG<br>AGCGTCATCCCATTTTGGAAACATTGTCGACGAGGTGCTTACCACGA<br>AAAGTATCCAACAATCTACCATCTGCGCAAGAAGCTGGTAGACTCAACC<br>GACAAGGCAGATCTGCGGCTTATCTATCTGGCGCTGGCCACATGATTA<br>AGTTCAGAGGCCATTTCTGATTGAGGGTGATCTCAACCCAGACAACTC<br>TGATGTCGACAAGCTGTTTCATTGAGCTGGTGCAGACCTACAACCAGCTG<br>TTTGAAGAGAACCCCATCAATGCCTCAGGTGTCGATGCCAAAGCCATTC<br>TGTCCGCGCGACTCTCTAAGAGCCGACGGCTAGAGAATCTGATCGCACA<br>ACTTCCAGGAGAGAAGAAGAATGGATTATTTGGAAACCTGATCGCCCTT<br>TCGCTAGGCTTGACGCCCAACTTCAAGTCTAACTTTGATCTAGCGGAGG<br>ACGCCAAGCTGCAGCTTTCTAAGGACACATACGACGATGATCTAGACAA<br>TCTGCTTGCGCAGATCGGTGACCAGTACGCTGATTTGTTTTAGCTGCCA<br>AGAACTTGAGCGACGCTATCCTCCTCTCCGACATCCTACGGGTGAACAC<br>CGAGATTACTAAGGCCCCCTTGTCAGCTTCGATGATCAAGCGGTACGAT<br>GAACATCACCAGGACCTGACACTACTCAAGGCACTCGTGCGCCAGCAG<br>CTTCCTGAAAAGTATAAGGAAATTTTCTTTGACCAAAGCAAAAATGGTT<br>ACGCCGGCTACATTGATGGTGGTGCATCTCAGGAGGAGTTCTACAAGTT<br>TATCAAGCCGATTCTCGAGAAAATGGACGGAACCGAGGAACCTCCTTGT<br>CAAGCTCAACCGAGAAGATCTACTGCGTAAGCAGAGAACCTTTGACAA<br>TGGATCCATTCTCATCAGATCCACCTCGGCGAACTGCATGCCATCCTCC<br>GTCGACAGGAGGACTTCTATCCATTTCTGAAAGACAACCGGGAAAAAA<br>TTGAAAAGATTCTTACGTTCCGAATTCCTACTACGTTGGACCTCTGGCT<br>CGAGGAAATTCCCGATTGCGCTGGATGACTAGAAAGTCTGAGGAGACC<br>ATCACCCCTGGAACCTTTGAGGAGGTGGTGGACAAGGGAGCCTCTGCC<br>CAGTCCTTTATCGAGCGAATGACCAACTTCGACAAAAATCTGCCCAATG<br>AGAAGGTGCTGCCCAAGCACTCTCTGTTGTATGAGTACTTCACCGTCTA<br>CAACGAGCTCACCAAGGTAAAGTATGTGACCGAAGGAATGCGTAAGCC<br>TGCCTTTTTATCGGGTGAGCAAAAGAAGGCGATCGTCGATCTGCTGTTT<br>AAGACCAACCGCAAGGTACAGTCAAACAACCTGAAGGAGGATTATTTT<br>AAGAAGATCGAGTGCTTCGACAGTGTTGAGATCTCGGGTGTGGAGGAC<br>CGTTCAACGCCTCACTTGGAACCTATCACGATCTCCTGAAGATCATCA<br>AGGATAAGGACTTTCTGGACAACGAAGAGAATGAGGACATCCTGGAAG<br>ATATTGTGTTGACTCTCACTTTGTTTCGAGGACAGGGAAATGATTGAAGA<br>ACGTCTCAAGACCTACGCACACCTGTTTCGACGACAAGGTCATGAAACA<br>GCTAAAACGGCGACGATACACTGGCTGGGGACGACTCTCGCGTAAGTT |

---

AATCAACGGCATCCGAGATAAACAGAGCGGCAAGACGATCCTGGATT  
CCTTAAGTCGGATGGATTGCGCAACCGAACTTCATGCAGCTCATTAC  
GACGACTCACTCACTTTTAAGGAAGACATTGAGAAGGCTCAGGTTTCTG  
GACAGGGCGACTCCCTTCATGAGCACATTGCTAACCTCGCGGGGTCGCC  
TGCAATCAAGAAGGGTATTCTCCAGACCGTTAAGGTGGTTGATGAGCTG  
GTCAAGGTGATGGGCGGACACAAGCCCGAGAACATCGTTATTGAGATG  
GCTCGAGAGAACCAGACAACCCAGAAGGGCCAGAAGAATTCTCGTGA  
GAGAATGAAGCGAATTGAGGAGGGTATTAAGGAGCTAGGGTCCCAGAT  
TCTCAAGGAACACCCGGTTGAGAATACTCAACTCCAAAACGAGAAGCT  
GTACCTTTACTACCTGCAGAATGGTCGGGACATGTACGTCGATCAGGAG  
CTTGATATCAACCGACTGAGCGACTATGACGTGGACCACATTGTTCCGC  
AGTCTTTTCTCGCTGACGACTCCATAGATAACAAAGTTTTGACTCGATCC  
GATAAGAACCGAGGAAAGTCCGATAACGTGCCTAGCGAAGAAGTCGTG  
AAGAAGATGAAGAACTACTGGCGACAGCTCTTGAATGCTAAGCTCATT  
CTCAGCGGAAATTCGACAATCTTACTAAGGCCGAGCGAGGCGGACTTTC  
CGAACTCGACAAGGCAGGCTTCATTAAAGCGACAATTGGTAGAGACGCG  
ACAAATCACCAAGCATGTGGCCCAAATTCTCGACTCGAGGATGAACAC  
AAAGTACGATGAGAACGACAACTTATCCGAGAAGTGAAGGTGATAAC  
CCTTAAGTCCAAGCTTGTCTCCGACTTCCGAAAGGATTTCCAGTTTTAC  
AAGGTGCGGGAGATCAATAACTATCACACGCTCATGATGCCTACCTGA  
ACGCAGTTGTGGGTACTGCCCTCATTAAAAAGTACCCTGCTCTTGAGAG  
TGAGTTTGTCTATGGAGACTACAAGGTCTACGACGTCAGAAAGATGATT  
GCTAAATCTGAGCAGGAGATCGGCAAGGCGACAGCTAAATACTTTTTCT  
ACTCCAACATCATGAACCTTCTTCAAGACTGAGATCACCTAGCCAACGG  
CGAGATCAGAAAGGCTCCTCTGATCGAGACGAATGGAGAGACAGGTGA  
GATTGTGTGGGACAAGGGCAGAGACTTTGCCACTGTGCGAAAGGTCT  
GAGCATGCCCCAGGTCAACATTGTAAAAAAGACCGAGGTTTCAGACGGG  
GGGGTTCTCTAAGGAAAGTATTCTGCCGAAGAGGAACTCTGACAAGTT  
AATCGCACGCAAAAAGGACTGGGACCCCAAGAAGTATGGAGGATTTGA  
TTCCCTACGGTTGCTTACAGTGTGTTGGTGGTCGCAAAAGTCGAGAAG  
GGCAAGTCGAAGAACTCAAGAGTGTGAAGGAGCTTCTGGGGATTACT  
ATCATGGAGAGATCGTCTTTTGAGAAGAACCCTATCGACTTCCTAGAGG  
CTAAGGGCTACAAGGAGGTCAAGAAAGACCTGATTATTAAGCTCCCCA  
AGTACTCCCTGTTCGAGCTGGAGAACGGACGAAAGAGGATGCTGGCCA  
GCGCCGGAGAATTACAAAAGGGCAACGAACCTGGCCCTGCCTTCTAAAT  
ATGTCAACTTTTTGTACCTTGCTTCCCATACGAGAACTTAAGGGCTCT  
CCAGAGGATAACGAGCAGAAACAACCTCTTGTGGAGCAGCATAAACAC  
TACCTGGACGAGATCATTGAGCAAATTTCCGAGTTCTCCAAAAGAGTCA  
TTCTGGCCGATGCTAACCTCGACAAGGTTCTGTCTGCGTACAACAAGCA  
CAGAGATAAGCCCATCAGAGAACAGGCCGAAAACATCATTCAATTTGTT  
CACTTACAAACCTGGGTGCTCCCGTGCTTTTAAGTACTTTGACACCA  
CCATTGACCGTAAGCGCTATACATCAACTAAGGAAGTTCTCGATGCCAC  
GCTGATCCACCAGTCAATCACCGGTTTGTACGAAACCCGCATTGACCTG  
AGTCAGCTCGGTGGCGAT

---
